# Supplementary material
Source: publisher site journal article supplement (https://www.spandidos-publications.com/2313/downloadSupplementary)

Figure S1. The expression of Runx2 in keloid tissues and normal skin tissues was measured by western blot analysis. Runx2, Runt-related transcription factor 2.

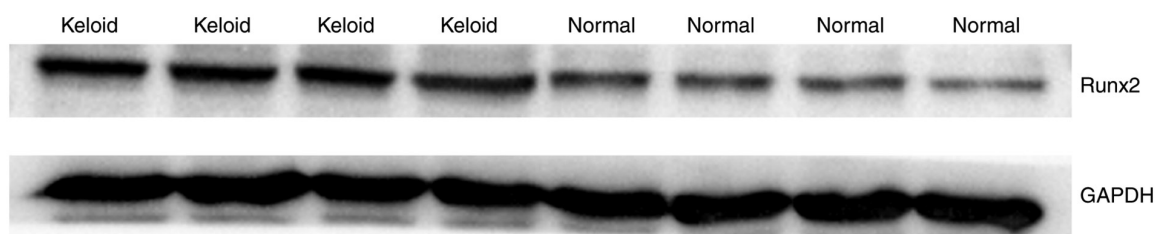

Supplement: Supplementary file 1 [file downloadSupplementary]
